# Supplementary material for: Sesamin Enhances Nrf2-Mediated Protective Defense against Oxidative Stress and Inflammation in Colitis via AKT and ERK Activation
Source: PubMed Central journal article supplement (PMC6732632; doi:10.1155/2019/2432416), 2019-08-26
Supplement: 2432416.f1.pdf [file 2432416.f1.pdf]

**Table 1. Primers for Quantitative Real-time PCR.**

| <b>Gene</b>    | <b>Species</b> | <b>Forward primer</b>     | <b>Reverse primer</b>   |
|----------------|----------------|---------------------------|-------------------------|
| GAPDH          | human          | GGAGCGAGATCCCTCCAAAAT     | GGCTGTTGTCATACTTCTCATGG |
| $\beta$ -Actin | human          | CATGTACGTTGCTATCCAGGC     | CTCCTTAATGTCACGCACGAT   |
| HO-1           | human          | CTGGAGGAGGAGATTGAGCG      | ATGGCTGGTGTGTAGGGGAT    |
| NQO-1          | human          | CAGCGCCCCGGACTGCACCAGAGCC | GGGAAGCCGGAAAGATACCCAGA |
| GCLC           | human          | GCAAGGCCCAGAACAGCACG      | CCCTCATCCATCTGGCAACTGT  |
| GCLM           | human          | TGTCTTGGAATGCACTGTATCTC   | CCCAGTAAGGCTGTAAATGCTC  |
| GR             | human          | TTCCAGAATACCAACGTCAAAGG   | GTTTTCGGCCAGCAGCTATTG   |
